# Supplementary material for: A Deep Convective Systems Database Derived from the Intercalibrated Meteorological Geostationary Satellite Fleet and the TOOCAN algorithm (2012–2020)
Source: Copernicus journal article supplement (doi:10.5194/essd-2024-36), 2024-03-26
Supplement: Supplementary file [file essd-2024-36-AC1-supplement.pdf]

Dear Editor,

We would like to thank the reviewers for their comments. The reviewers have made a number of comments that will benefit this manuscript. In response to their thorough evaluations, we have carefully revised our manuscript to address each question and concern. Detailed responses to their comments can be found in the author comments.

We have also adjusted the manuscript accordingly to the journal standards:

- The reference list has been compiled according to the journal standards.
- We have adjusted the color schemes in the figures 1 and 2 by using a Color Universal Design (CUD) palette, to ensure that colors are distinguishable by everyone, combined with some Different line styles and markers to enhance distinguishability. All the figures have been checked using the Coblis–Color Blindness Simulator to check for distinguishability. Figs. 1, 2, 7 have passed the test. More specifically, we have determined that Fig. 7 is sufficiently distinguishable for individuals with color blindness without any modifications.
- Finally, the color cells of the Tables have been removed to fit with the journal requirements.

As supplement to the paper, a video (<https://doi.org/10.5446/68200>, Fiolleau 2024) has been added to the paper to illustrate at a 30-minute time frequency, showing the DCS identified by TOOCAN in October 2015 over the Western Pacific region.
